# Supplementary material
Source: publisher figshare collection journal article supplement (https://acs.figshare.com/ndownloader/files/4153297)
Supplement: Supplementary file 1 [file 4153297]

**Supporting Information 4**

**Validation of Three Methods: Original Pyrogallol Method,  
Improved Pyrogallol Method and NBT Method**

XICAN LI

*School of Chinese Herbal Medicine, Guangzhou University of Chinese  
Medicine, Guangzhou, China*

1 The **precision** of improved pyrogallol method, original pyrogallol method and NBT method

Tab. V1 Improved pyrogallol method for Trolox (pH7.4,  $\lambda=325\text{nm}$ ,  $37^\circ\text{C}$ ,  $\Delta A_0 = 0.592$ )

| Trolox concentration $\mu\text{g/mL}$ | $\Delta A$ | Inhibition % | Mean  | RSD%        |
|---------------------------------------|------------|--------------|-------|-------------|
| 125                                   | 0.537      | 9.341029     | 9.23  | <u>3.80</u> |
|                                       | 0.54       | 8.834558     |       |             |
|                                       | 0.536      | 9.509853     |       |             |
| 250                                   | 0.475      | 19.80811     | 19.86 | <u>1.30</u> |
|                                       | 0.476      | 19.63929     |       |             |
|                                       | 0.473      | 20.14576     |       |             |
| 500                                   | 0.35       | 40.91111     | 40.79 | <u>2.08</u> |
|                                       | 0.346      | 41.5864      |       |             |
|                                       | 0.356      | 39.89817     |       |             |
| 750                                   | 0.213      | 64.03999     | 62.69 | <u>2.30</u> |
|                                       | 0.22       | 62.85822     |       |             |
|                                       | 0.23       | 61.16998     |       |             |
| 1000                                  | 0.13       | 78.05238     | 78.78 | <u>0.87</u> |
|                                       | 0.125      | 78.8965      |       |             |
|                                       | 0.122      | 79.40297     |       |             |
| 1250                                  | 0.058      | 90.2077      | 90.32 | <u>0.57</u> |
|                                       | 0.054      | 90.883       |       |             |
|                                       | 0.06       | 89.87006     |       |             |

Tab. V2 Original pyrogallol method for Trolox (pH8.2,  $\lambda=420\text{nm}$ , R.T.,  $\Delta A_0 = 0.596$ )

| Trolox concentration | $\mu\text{g/mL}$ | $\Delta A$ | Inhibition<br>% | Mean  | RSD%         |
|----------------------|------------------|------------|-----------------|-------|--------------|
| 250                  |                  | 0.553      | 7.266578        | 8.16  | <u>12.55</u> |
|                      |                  | 0.549      | 7.937344        |       |              |
|                      |                  | 0.541      | 9.278876        |       |              |
| 750                  |                  | 0.498      | 16.48961        | 17.38 | <u>4.85</u>  |
|                      |                  | 0.492      | 17.49576        |       |              |
|                      |                  | 0.488      | 18.16653        |       |              |
| 1250                 |                  | 0.449      | 24.7065         | 25.10 | <u>3.91</u>  |
|                      |                  | 0.451      | 24.37111        |       |              |
|                      |                  | 0.44       | 26.21572        |       |              |
| 1750                 |                  | 0.398      | 33.25877        | 34.04 | <u>2.22</u>  |
|                      |                  | 0.393      | 34.09722        |       |              |
|                      |                  | 0.389      | 34.76799        |       |              |
| 2250                 |                  | 0.33       | 44.66179        | 44.55 | <u>3.02</u>  |
|                      |                  | 0.323      | 45.83563        |       |              |
|                      |                  | 0.339      | 43.15257        |       |              |
| 2500                 |                  | 0.291      | 51.20176        | 51.43 | <u>0.75</u>  |
|                      |                  | 0.291      | 51.20176        |       |              |
|                      |                  | 0.287      | 51.87253        |       |              |

Tab. V3 NBT assay for Trolox (pH7.4, R.T.,  $A_{0, 560nm} = 1.236$ )

| Trolox concentration<br>$\mu\text{g/mL}$ | $A_{560nm}$ | Inhibition % | Mean  | RSD%         |
|------------------------------------------|-------------|--------------|-------|--------------|
| 125                                      | 1.133       | 8.333333     | 6.63  | <u>64.31</u> |
|                                          | 1.115       | 9.789644     |       |              |
|                                          | 1.214       | 1.779935     |       |              |
| 250                                      | 1.057       | 14.4822      | 18.82 | <u>35.57</u> |
|                                          | 1.045       | 15.45307     |       |              |
|                                          | 0.908       | 26.53722     |       |              |
| 500                                      | 0.712       | 42.39482     | 41.64 | <u>5.29</u>  |
|                                          | 0.752       | 39.15858     |       |              |
|                                          | 0.7         | 43.3657      |       |              |
| 750                                      | 0.417       | 66.26214     | 62.59 | <u>5.31</u>  |
|                                          | 0.497       | 59.78964     |       |              |
|                                          | 0.473       | 61.73139     |       |              |
| 1000                                     | 0.465       | 62.37864     | 71.30 | <u>10.86</u> |
|                                          | 0.305       | 75.32362     |       |              |
|                                          | 0.294       | 76.21359     |       |              |
| 1250                                     | 0.245       | 80.17799     | 80.45 | <u>1.54</u>  |
|                                          | 0.225       | 81.79612     |       |              |
|                                          | 0.255       | 79.36893     |       |              |

## 2 The **linearity** of improved pyrogallol assay

Note: The data below with underline were mentioned in the main text (Results and discussion).

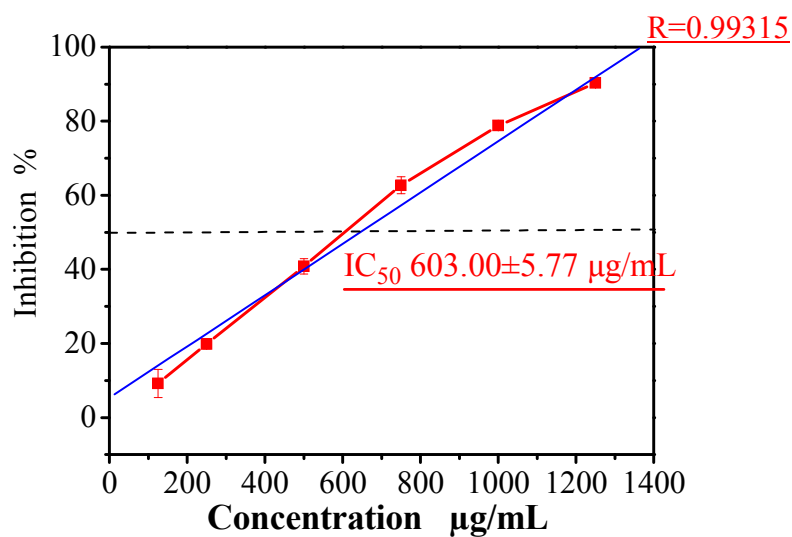

Fig. V1 Linearity graph of improved pyrogallol assay for Trolox  
Data were presented as the mean  $\pm$  SD for three replicates.

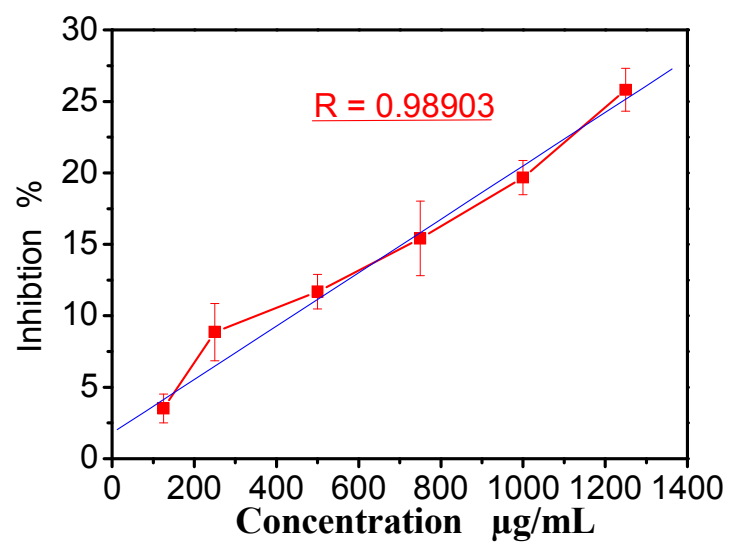

Fig. V2 Linearity graph of original pyrogallol assay for Trolox  
Data were presented as the mean  $\pm$  SD for three replicates.

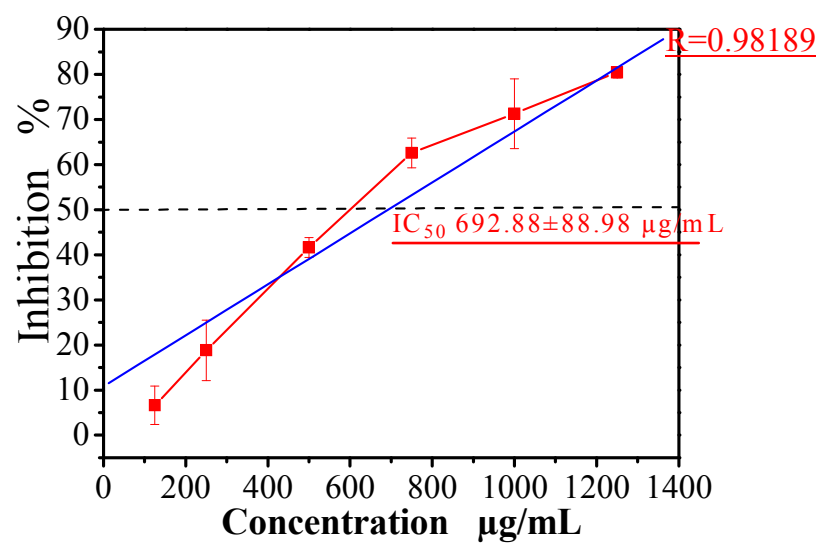

Fig. V3 Linearity graph of NBT method for Trolox  
Data were presented as the mean  $\pm$  SD for three replicates.

### 3 The **reproducibility** of improved pyrogallol method, original pyrogallol method and NBT method

Note: The data below with underline were mentioned in the main text (Results and discussion).

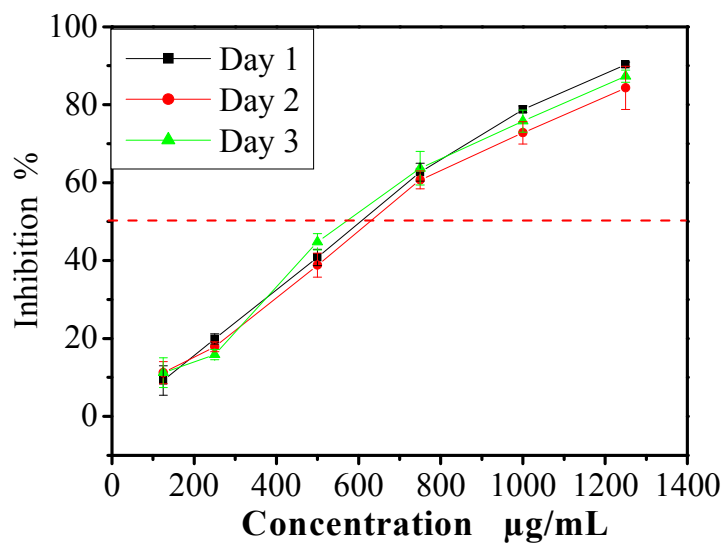

Fig. V4 The reproducibility of improved pyrogallol method for Trolox (3 days)  
Data were presented as the mean  $\pm$  SD for three replicates.

According to the Figure, three  $IC_{50}$  values was calculated as: 603.00, 681.07, 648.93,  $\mu\text{g/mL}$  for day 1, day 2 and day 3. The RSD % of three  $IC_{50}$  values were 6.09%.



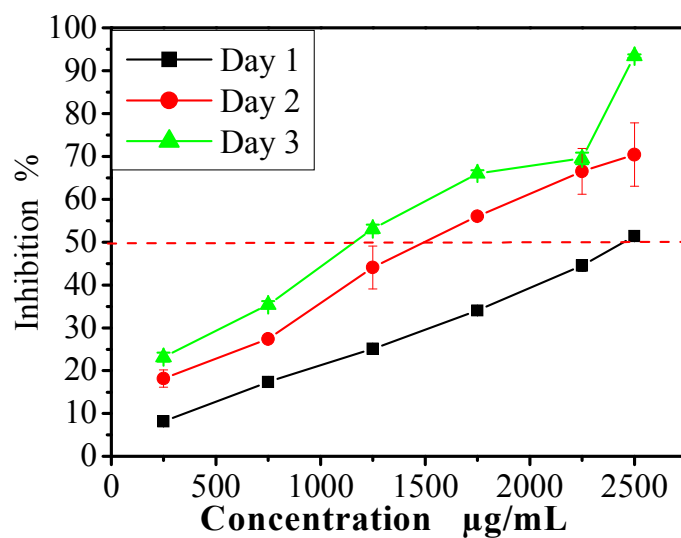

Fig. V5 The reproducibility of original pyrogallol method for Trolox (3 days)  
Data were presented as the mean  $\pm$  SD for three replicates.

According to the Figure, three  $IC_{50}$  values was calculated as: 2416.67, 1578.79, 1218.15  $\mu\text{g/mL}$  for day 1, day 2 and day 3. The RSD % of three  $IC_{50}$  values were 35.38%.

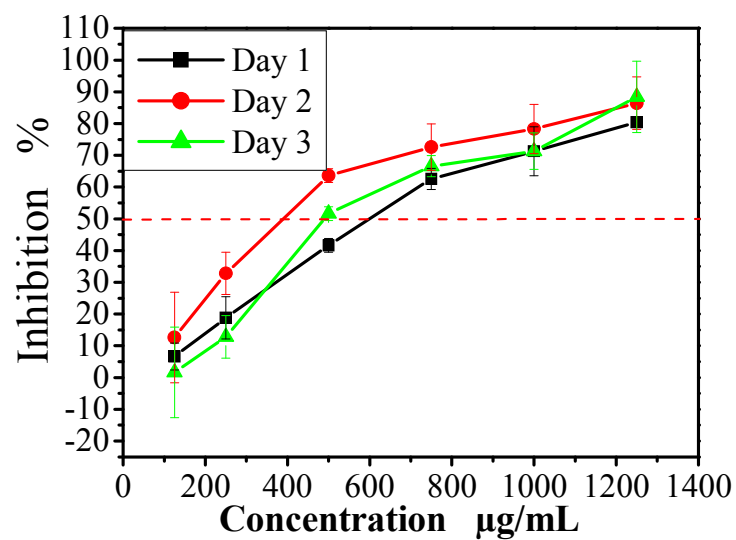

Fig. V6 The reproducibility of NBT method for Trolox (3 days)  
Data were presented as the mean  $\pm$  SD for three replicates.

According to the Figure, three  $IC_{50}$  values was calculated as: 692.88, 520.37, 662.39  $\mu\text{g/mL}$  for day 1, day 2 and day 3. The RSD % of three  $IC_{50}$  values were 14.72%.
